# Supplementary material
Source: publisher figshare collection journal article supplement (https://tandf.figshare.com/ndownloader/files/13711472)
Supplement: Supplementary file 1 [file 13711472]

**Appendix**

**Fig. A.1** The fitting kinetic curve of the cell growth and substrates consumption

**Fig. A.2** Growth curve of PSB with respect to time in brewery wastewater

**Table A.1** The variance in concentrations of different N forms with time

| Time  (h) | NH4+  (mg/L) | NO3-  (mg/L) | Organic-N  (mg/L) | NO2-  (mg/L) |
| --- | --- | --- | --- | --- |
| 0 | 52.2±5.21 a | 16.9±3.01 a | 2.22±0.29 a | 0.08±0.01 a |
| 24 | 40.2±2.50 b | 5.67±1.22 b | 0.88±0.19 a | 0.06±0.01 a |
| 48 | 26.3±4.38 c | 2.11±0.22 bc | 1.2±0.21 a | 0.04±0.00 a |
| 72 | 10.8±2.07 d | 0.85±0.05 c | 1.1±0.33 a | 0.08±0.00 a |
| 96 | 4.6±0.94 e | 0.34±0.01 c | 0.45±0.19 b | 0.01±0.00 b |

a, b, c, d: The variances between different time samples for the same N forms, P ˂0.01.
